# Supplementary material for: AAV-Vectored Expression of the Vascular Normalizing Agents 3TSR and Fc3TSR, and the Anti-Angiogenic Bevacizumab Extends Survival in a Murine Model of End-Stage Epithelial Ovarian Carcinoma
Source: MDPI journal article supplement (doi:10.3390/biomedicines10020362), 2022-02-02
Supplement: s1 [file s1]

Supplementary Material

# AAV-vectored expression of the vascular normalizing agents 3TSR and Fc3TSR, and the anti-angiogenic Bevacizumab extends survival in a murine model of end-stage epithelial ovarian carcinoma

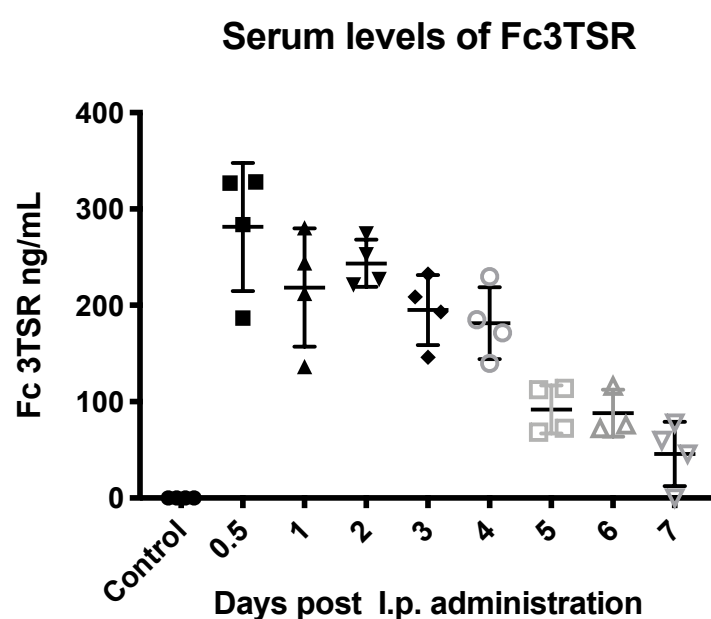

**Figure S1.** Serum levels of Fc3TSR. The recombinant protein version of the drug Fc3TSR was injected via intraperitoneal administration. Serum levels were monitored over 7 days to quantify the gradual decline in serum concentrations. i.p., intraperitoneal administration route; 3TSR, thrombospondin-1 type I repeats. Error bars denote standard deviation.

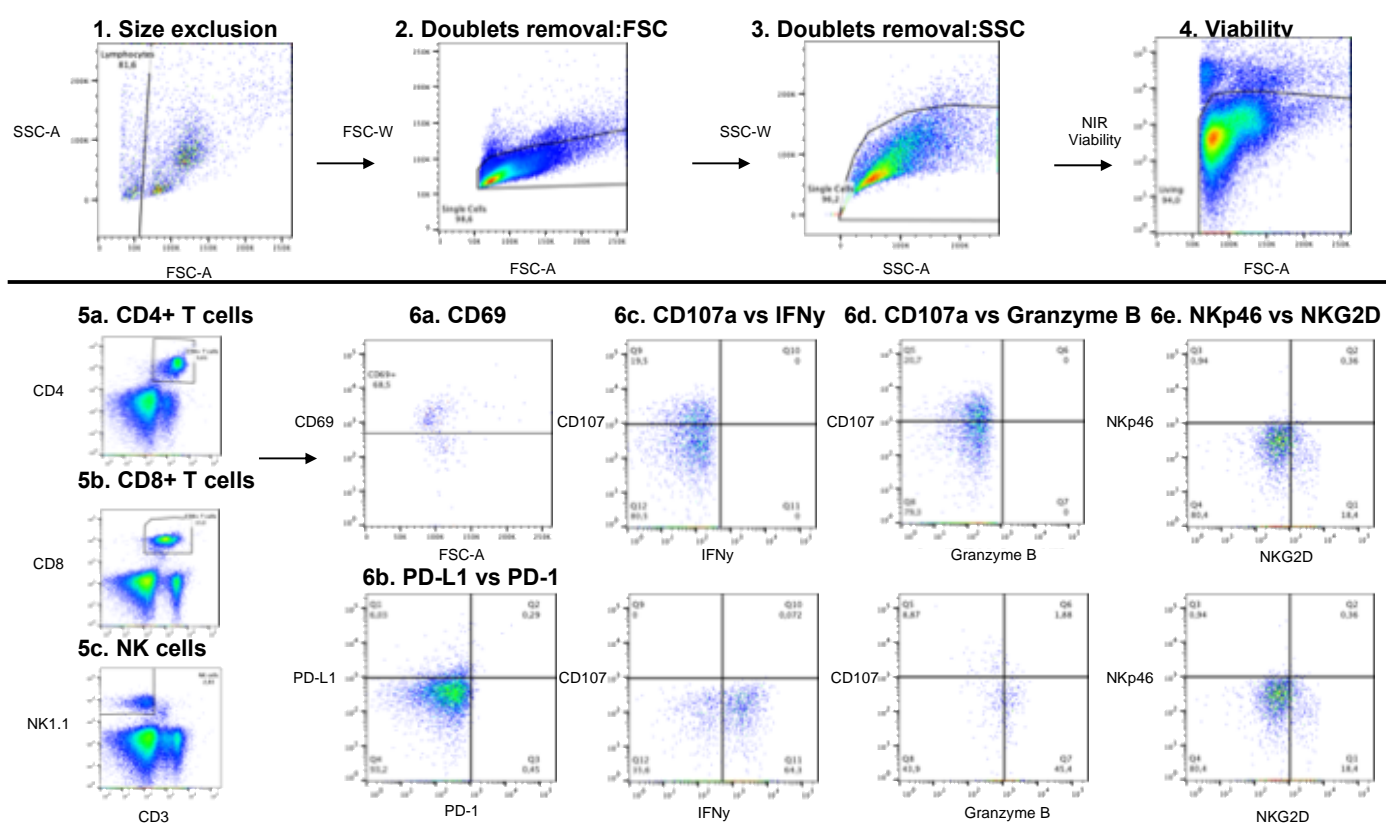

**Figure S2.** Flow cytometry gating strategy. Data was analyzed using FlowJo software. Cells were initially gated based on size. Subsequently, doublets were removed as well as non-viable cells based on Zombie NIR Fixable Viability Dye Staining. CD4<sup>+</sup> T cells were defined as CD3<sup>+</sup> CD4<sup>+</sup>. CD8<sup>+</sup> T cells were defined as CD3<sup>+</sup> CD8<sup>+</sup>. NK cells were defined as CD3<sup>+</sup> NK1.1<sup>+</sup>. Each of these three immune cell subsets were analyzed for expression levels of the early activation marker CD69, and the immune checkpoint proteins programmed death ligand 1 (PD-L1) and programmed cell death protein 1 (PD-1). NK cells were further analyzed for expression levels of the serine protease Granzyme B, the anti-viral IFN- $\gamma$ , the NK functional marker CD107a, the natural cytotoxicity receptor NKp46, and the cytotoxic activating receptor NKG2D.
